# Supplementary material for: Cost-Effectiveness of Serum Galactomannan Surveillance during Mould-Active Antifungal Prophylaxis
Source: MDPI journal article supplement (doi:10.3390/jof7060417), 2021-05-26
Supplement: s1 [file s1]

**Table S1.** Total cost, effectiveness and incremental cost-effectiveness ratio of routine GM surveillance compared to no monitoring in patients receiving non-mould-active prophylaxis.

| Strategy                                             | Total Cost                 | Incremental Cost       | QALY Gained | Incremental QALY | ICER #    |
|------------------------------------------------------|----------------------------|------------------------|-------------|------------------|-----------|
| Routine GM assay during non-mould-active prophylaxis | SGD 12,225<br>(USD 8989)   | -                      | 5.3053      | -                |           |
| No GM assay during non-mould-active prophylaxis      | SGD 15,294<br>(USD 11,246) | SGD 3069<br>(USD 2257) | 5.3029      | -0.0024          | dominated |

ICER: incremental cost-effectiveness ratio, GM: galactomannan, QALY: quality-adjusted life-year. #A dominated strategy is more costly and less effective relative to its comparator.
